# Supplementary material
Source: publisher site journal article supplement (http://www.degruyter.com/publication/journal_key/PAC/downloadAsset/PAC_Instructions%20for%20Authors.pdf)
Supplement: Supplementary file 1 [file PAC_Instructions%20for%20Authors.pdf]

# Pure and Applied Chemistry

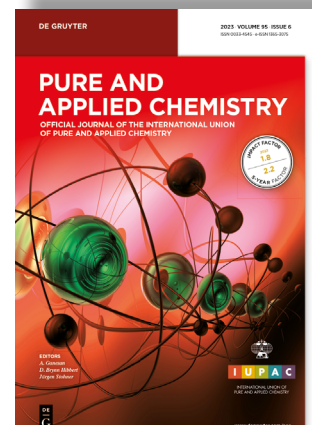

## Table of Contents

|                                                                   |    |
|-------------------------------------------------------------------|----|
| <b>Scope and general policies of the journal</b> .....            | 2  |
| Scope.....                                                        | 2  |
| Article (manuscript) categories.....                              | 2  |
| <b>Peer review and preprint policies</b> .....                    | 3  |
| Peer review information.....                                      | 3  |
| Peer Review of Research and Review Articles.....                  | 3  |
| Peer Review of Technical Reports and Recommendations.....         | 3  |
| Issue based publication.....                                      | 3  |
| Rejection of manuscripts.....                                     | 3  |
| Appeals.....                                                      | 3  |
| Permission to Reproduce.....                                      | 4  |
| Preprint policy.....                                              | 4  |
| Dissemination of IUPAC Recommendations and Technical Reports..... | 4  |
| Inclusive language policy.....                                    | 4  |
| <b>Submission of manuscripts</b> .....                            | 4  |
| ORCID.....                                                        | 5  |
| IUPAC Technical Reports and Recommendations.....                  | 5  |
| Submission declaration and verification.....                      | 5  |
| Scientific misconduct.....                                        | 6  |
| Research integrity.....                                           | 6  |
| <b>Post-acceptance</b> .....                                      | 6  |
| Galley proofs.....                                                | 6  |
| Offprints.....                                                    | 6  |
| Repository policy.....                                            | 6  |
| Copyright.....                                                    | 7  |
| Open Access in hybrid journals.....                               | 7  |
| Article Processing Charges (APCs).....                            | 7  |
| Open Access and Research Gate.....                                | 7  |
| <b>Ethical conduct of research</b> .....                          | 7  |
| Acknowledgments.....                                              | 7  |
| Informed consent.....                                             | 7  |
| Author contributions.....                                         | 8  |
| Competing interests.....                                          | 8  |
| Research funding.....                                             | 8  |
| Data availability.....                                            | 9  |
| <b>Preparation of manuscript</b> .....                            | 9  |
| Title page information.....                                       | 9  |
| Language.....                                                     | 10 |
| General format and manuscript elements.....                       | 10 |
| Abstract.....                                                     | 10 |
| Keywords.....                                                     | 10 |
| Headings.....                                                     | 10 |
| References.....                                                   | 10 |
| Figures and figure captions.....                                  | 12 |
| Tables and table captions.....                                    | 13 |
| Abbreviations.....                                                | 13 |
| Equations and symbols.....                                        | 13 |
| Structural formulas.....                                          | 13 |
| Mathematical expressions and chemical equations.....              | 13 |
| Numbers.....                                                      | 13 |
| Symbols and units.....                                            | 14 |
| Appendices.....                                                   | 14 |
| Supplementary material.....                                       | 14 |

## Scope and general policies of the journal

### Scope

*Pure and Applied Chemistry* is the official monthly journal of the International Union of Pure and Applied Chemistry (IUPAC). It publishes the society's recommendations on chemical terminology, nomenclature, symbols and units, as well as data standards. In addition, the journal publishes original research at the forefront of all aspects of pure and applied chemistry, often arising from IUPAC scientific events and IUPAC prize awardees.

### Article (manuscript) categories

Manuscripts fall into two broad categories: 1) IUPAC **Technical Reports and Recommendations** and 2) original **Research Articles, Reviews, and Perspectives**. These two categories differ in manuscript preparation and review (for details, see below). In addition, specific journal issues may contain an **Editorial** and **Preface**.

#### 1) Technical Reports and Recommendations

Technical Reports and Recommendations are publications resulting from IUPAC Projects or other research activities. There are specific **Guidelines** for their preparation and formatting, and authors should refer to [Kaiser, Hibbert, Stohner, PAC 94, 1257 \(2022\)](#) for details. Once accepted, they are published open access under a [CCBY NC ND license](#) on the journal website.

- **Technical Reports** include the compilation and critical evaluations of data, or of parameters and equations; the critical assessment of methods and techniques; guidelines for the presentation of methods of analysis or for the calibration of instruments; determinations of specific elements or compounds in selected samples in special environments; studies of the biodegradability of materials; chemical process control aspects; and evaluations of properties of specific materials.
- **Recommendations** include studies on nomenclature, symbols, terminology, or conventions, and their purpose is to recommend unambiguous, uniform, and consistent nomenclature and terminology for specific scientific fields. They are usually presented as glossaries of terms for specific chemical disciplines; definitions of terms relating to a group of properties; nomenclature of chemical compounds and their classes; terminology, symbols, and units in a specific field; classifications and uses of terms in a specific field; and conventions and standards of practice for presenting data in a specific field.

#### 2) Research Articles, Reviews, and Perspectives

Research Articles, Reviews, and Perspectives often arise from IUPAC endorsed conferences or IUPAC prize awards. However, they are not limited to such outputs, and we invite submission of high-quality manuscripts from the global scientific community in all areas of pure and applied chemistry. There are no word limits for these manuscripts or restrictions on the number of accompanying figures or illustrations.

- **Research Articles** present the author's original research in the format of short communications or full papers. Although not obligatory, manuscripts will typically contain an Introduction followed by Results and Discussion, Conclusions, Materials and Methods and References. The experimental section must provide full details of all procedures and characterization data for novel materials, some of which may be placed separately in a Supporting Information document.
- **Review Articles** provide an authoritative and critical summary of scientific developments in a specific area of chemistry. They should not overlap significantly with other recently published overviews.
- **Perspectives** are similar to reviews but focus on the author's own work placed in the context of a wider field of research.

## Peer review and preprint policies

### Peer review information

#### Peer Review of Research and Review Articles

*Pure and Applied Chemistry* is a single-blind journal. Manuscripts are reviewed anonymously by at least two independent reviewers selected by the Editors. The authors may provide the names, institution, country, and e-mail addresses of up to four potential reviewers. Reviewers indicated by the authors must be from different institutions than the corresponding author. Authors may also provide names of reviewers they wish to exclude from reviewing their manuscripts. The editors reserve the right to reject submitted manuscripts without peer review if the studies are deemed to be of insufficient originality or limited interest to the journal's target audience.

#### Peer Review of Technical Reports and Recommendations

The peer review of Technical Reports and Recommendations is conducted in a manner to ensure that the widest possible consensus has been reached among all IUPAC Divisions and other bodies of the Union, between IUPAC and other standardizing organizations including the International Council for Science (ICSU) and the Conférence Générale des Poids et Mesures (CGPM) and its Committees. More details on the reviewing process can be found in [Kaiser et al. 2022](#).

Prior to submission, a written approval by the sponsoring IUPAC Division President(s) (DP approval) must confirm the manuscript has satisfactorily completed Division review. After approval, the authors will be invited to submit their manuscript online to *Pure and Applied Chemistry*. Once the Editor decides the manuscript is suitable, it will be internally reviewed by the IUPAC Interdivisional Committee on Terminology, Nomenclature and Symbols (ICTNS) for consistency of terminology, nomenclature and symbols usage with current IUPAC standards and externally by experts in academia and industry (up to 15 in case of Recommendations; up to 5 for Technical Reports). The Editor has the final responsibility for accepting or rejecting the manuscript which may undergo several iterations and revisions. An accepted Technical Report directly proceeds to journal publication. In contrast, once the draft of an accepted Recommendation is checked by the Editor and the authors, it is published as a Provisional Recommendation on a dedicated webpage for public review and comment. This allows the IUPAC National Adhering Organizations (NAOs) a period of four months' public review during which the Provisional Recommendation should not be quoted publicly. The author(s) will revise the Provisional Recommendation in the light of the comments received during the public review phase and submit a revised manuscript for final review by ICTNS members and the Division President.

Accepted Provisional Recommendations and Technical Reports enter the final phase, where the publisher will edit the manuscript for language and publisher-specific issues. This copy-edited manuscript is checked by the Editor and the authors. After typesetting by the publisher, proofs will be sent to the authors for final review and cross-checking by the Editor before publication.

### Issue based publication

Articles are first published online in the Ahead-of-Print section as DOI citable articles and are later assigned to an issue with final page numbers.

### Rejection of manuscripts

Manuscripts dealing with subjects that have been well studied in the literature, that do not resolve questions raised by previous studies, or manuscripts of insufficient originality or limited interest to the journal's target audience are likely to be rejected without peer review.

### Appeals

Manuscripts that have been rejected for publication will be reconsidered only at the discretion of the Editor(s). Authors wishing to request reconsideration of a previously rejected manuscript must do so in written form and submit a rebuttal by e-mail to the journal's editorial office. Authors should provide detailed reasons why they believe the manuscript should be reconsidered. If the rebuttal is accepted, the author will be asked to re-submit the manuscript, or the decision will be reversed.

## Permission to Reproduce

For any material that is not original, permission to reproduce must be obtained in advance in writing by the author(s) from those concerned. An appropriate acknowledgment should be included in the text. A Permission Request Form can be found [here](#).

## Preprint policy

De Gruyter does not consider the following purposes of a paper as pre-publication: publication in the form of a congress abstract, publication as an academic thesis, publication as an electronic preprint on recognized servers such as arXiv, RePEc, bioRxiv, chemRxiv, ResearchSquare, etc.

## Dissemination of IUPAC Recommendations and Technical Reports

Dissemination of IUPAC Recommendations and Technical Reports is encouraged and there is no objection to:

- Republication or reproduction of any report or its storage and/or dissemination by electronic means, providing it is in accordance with the terms of the [CCBY NC ND license](#). Furthermore, no formal IUPAC permission is needed on condition that an acknowledgment, with full reference to the source along with use of the copyright symbol ©, the name of IUPAC & De Gruyter, and the year of publication, is prominently visible.
- Publication of a translation into another language is subject to the additional condition of prior approval from the relevant IUPAC National Adhering Organization, and requests should be addressed to the IUPAC Secretariat.

## Inclusive language policy

Inclusive language recognizes diversity, conveys respect for all people, is sensitive to differences and promotes equal opportunities. Content should not make assumptions about readers' beliefs or commitments; should not contain anything that might suggest that one person is superior to another because of age, gender, race, ethnicity, culture, sexual orientation, disability, or health condition; and should use inclusive language throughout. Authors should ensure that their writing is free from prejudice, stereotypes, slang, references to the dominant culture and/or cultural assumptions.

We advise the following approach: Aim for gender neutrality by using plural nouns (clinicians, clients, participants) as standard and avoiding "he" or "she", wherever possible. Instead, please use "they". We recommend avoiding the use of descriptors that refer to personal characteristics such as age, gender, race, ethnicity, culture, sexual orientation, disability or health status unless they are relevant and valid.

## Submission of manuscripts

*Pure and Applied Chemistry* seeks to achieve representative, timely and scientifically useful publications. Accordingly, authors are encouraged to make every effort to participate, and to adhere to the prescribed timetable for submission of manuscripts.

Submit manuscripts exclusively via the online ScholarOne site at: <https://mc.manuscriptcentral.com/pac>.

Authors of Research and Review Articles are free to submit the manuscript online, while authors of Technical Reports and Recommendations will receive an e-mail inviting them to submit a paper for consideration after the divisional approval has been granted. If the 'accept' link is clicked, they will receive an e-mail providing them with a login ID and temporary password to access ScholarOne Manuscripts. The information required includes keywords and the names of proposed reviewers. Complete address information for the principal author and co-authors should be entered at this time. The online manuscript submission process can be interrupted at any point and resumed later. A submission template and instructions are available on the [Union's web site](#) or can be obtained from the IUPAC Secretariat (E-mail: [pac@iupac.org](mailto:pac@iupac.org)). If you cannot use the submission template, make sure to follow the instructions for preparing your manuscript:

- Include all parts of the paper in a single Microsoft Word file if possible.
- Submit illustrations in separate files as well as the single Word file.
- Do not use the carriage return (enter) at the end of lines within a paragraph.

- Turn the hyphenation option off.
- Do not use the endnote feature for references.
- Do not number headings.
- Take care not to use l (ell) for 1 (one), O (capital o) for 0 (zero), or ß (German esszett) for β (beta).
- Use spaced en-dashes.
- Use a tab, not spaces, to separate data points in tables.
- If you use a table editor function, ensure that each data point is contained within a unique cell; i.e., do not use carriage returns within cells.

After the manuscript has been submitted, its current status can be determined using ScholarOne Manuscripts. (Note: PDF files should only be submitted as an example of what the illustration or text looks like. Microsoft Word file is preferred for editing.) Please note that you will need to export your final manuscript to PDF format to submit your paper to ScholarOne. The original Word file should be uploaded as a "Supplementary information" file.

If you are submitting a LaTeX file, please download the class file and the respective sample file including the instructions for formatting. Click [here](#) to download the De Gruyter LaTeX Template.

We strongly recommend the authors register with institutional e-mail addresses, and refrain from using private e-mail addresses. A cover letter must be submitted for each manuscript upon first submission. Please address the cover letter to the Editor-in-Chief. Revised manuscripts must be accompanied by a point-by-point reply to the reviewers' criticisms. Major changes in the revised manuscript must be highlighted, preferably in tracked changes mode. A second, clean version should always be submitted for major changes. After submission, all authors are contacted by the Editor and informed about the submission. Is an author for whatever reason not approving the submitted manuscript, the Editor should be contacted immediately and informed about the issue(s) to take appropriate measures.

## ORCID

The ORCID (Open Researcher and Contributor ID) is a non-profit, publisher-independent system that is used to uniquely identify academics and their publications. Click [here](#) for detailed information about ORCID. Submitting authors can login with username and password. If the journal uses ScholarOne as a submission tool, authors can also login with their ORCID number. Providing an ORCID number for each author is strongly recommended. ORCID numbers should be listed on the title page.

## IUPAC Technical Reports and Recommendations

There are special requirements for deciding the category (Technical Report or Recommendations) to which a particular report belongs. Additional instructions can be found in:

- Procedure for Publication of IUPAC Technical Reports and Recommendations, or [online](#)
- Preparation, formatting and review of IUPAC Technical Reports and Recommendations, IUPAC-sponsored books, or other items carrying the IUPAC label (2022), [online](#)

These Guidelines contain more details than described in these general instructions, and authors are advised to consult these documents carefully before drafting a manuscript.

## Submission declaration and verification

Submission of a manuscript to a journal implies that the work described has not been published previously, except in the form of an abstract, academic thesis, lecture, or preprint; that it is not under consideration for publication elsewhere (multiple, redundant, concurrent publication); that publication of the work is approved by all authors and tacitly or explicitly by the responsible authorities where the work was carried out. Exceptions are listed under Preprint policy. For information on plagiarism and publication ethics, please refer to [COPE – Committee of Publication Ethics](#).

To exclude potential overlap with prior publication(s), your manuscript may be checked by the plagiarism checker Crossref Similarity Check ([iThenticate](#)). Previously published material must be referenced appropriately in the manuscript, regardless of whether the material was previously published in a subscription based, hybrid or open access journal, or in another language.

## Scientific misconduct

Only articles that have not been or will not be published elsewhere will be published in the journal, excluding articles that fall under De Gruyter's [Repository Policy](#). Multiple submissions/publications or redundant publications (i.e., republication of data already published by the same authors) will be rejected. If identified after publication, the journal reserves the right to publish a retraction note. In any case, editors will follow COPE's Code of Conduct and implement its advice.

## Research integrity

The authors are responsible for all aspects of the study and will ensure that any questions regarding the accuracy and integrity of any part of the work are adequately investigated and resolved. By submitting your manuscript to *Pure and Applied Chemistry* the authors declare that they are the sole and intellectual authors of the manuscript. We do not accept submissions that name Artificial Intelligence (AI) and/or Machine Learning Tools as credited author(s) on a manuscript because such tools cannot take responsibility for the submitted work and therefore cannot be considered as eligible authors. Where such tools or technologies are used as part of the design or methodology of a research study, their use should be clearly described in the Acknowledgments section. In case of doubt, the Editorial Board reserves the right to ask the authors to submit the raw experimental data.

## Post-acceptance

### Galley proofs

The corresponding author of an article receives the galley proofs in electronic form to check them for editing and typesetting accuracy. Corresponding authors receive an e-mail notification ("Check your proof") with a link to the online proofreading system (Proof Central) through which they can access their galley proofs. The interface is similar to MS Word: authors can edit the text by entering their corrections directly, adding comments, and answering questions from the copy editor. If preferred authors can also download a PDF version of their article, annotate, and upload edits.

All instructions for proof corrections, including deadlines, will be given in the e-mail notification to the corresponding author, along with a user guide, providing step-by-step instructions for inserting corrections.

### Offprints

Electronic files of typeset articles in Adobe Acrobat PDF format are provided free of charge. The corresponding author will receive an e-mail notification when the article has been published online along with instructions on how to access the article.

## Repository policy

Authors may publish their articles in a public repository after an embargo period of 12 months (see De Gruyter's [Sharing Policy](#)). Only the accepted author version of the manuscript, not the PDF version of the published article, can be published:

Immediately

- via their non-commercial personal website, blog or social media channels
- by updating a preprint in arXiv, RePEc, bioRxiv, ResearchSquare, etc. with the version of the accepted manuscript
- as a closed deposit via their research institute or institutional repository for internal institutional purposes or as part of an invitation-only research collaboration workgroup
- directly by providing copies to their students or to research collaborators for their personal use
- for private scholarly sharing as part of an invitation-only work group

After an embargo period

- as open deposits to institutional or subject repositories
- to scholarly collaboration networks (SCNs)

## Copyright

If accepted, papers become the copyright of IUPAC and De Gruyter. Authors will be required to give signed consent to publication, but permission to use material elsewhere (for example in review articles) will normally be granted on request. The Copyright form will be signed via acknowledgment in ScholarOne.

All Technical Reports and Recommendations are published Open Access under a Creative Commons NC ND License (CCBY NC ND) immediately on publication, with no charges for authors. Please refer to the details of the [CCBY 4.0 NC ND license](#) for details on distribution and reuse rights.

Research Articles and Review Articles will be made freely available online two years after publication in an issue.

## Open Access in hybrid journals

Authors of Research and Review Articles have the option of publishing their manuscripts open access. In such cases, the author declares consent to place the article under the [Creative Commons license CC-BY 4.0](#), and the exclusive rights previously granted to the publisher will be converted into non-exclusive rights. The author confirms that they have already acquired all necessary rights for all components of the work in the event of an open access publication.

## Article Processing Charges (APCs)

Authors publishing in hybrid journals do not have to pay APCs if they do not wish to publish their article open access. After acceptance and before production of an article, authors can decide whether to publish their article open access. Only if they decide to publish open access, an APC will be charged. All articles are peer-reviewed and accepted for publication based on the quality of their scientific contribution. The decision to publish open access does not affect the peer review process or the acceptance of the article. The APC for *Pure and Applied Chemistry* is € 2000. De Gruyter has [open access agreements](#) in place that allow authors to publish open access articles at no cost at all – or with a significant discount. For more information on De Gruyter's open access policy, please read our [Open Access Policies](#).

## Open Access and Research Gate

Authors publishing Open Access will see their articles automatically added to their publication pages on [Research Gate](#).

## Ethical conduct of research

**Manuscripts must follow certain ethical guidelines** to be considered for publication. These can generally be found in the [Publication Ethics and Malpractice Statement](#). Accordingly, **before submitting your manuscript, please make sure that you and your co-authors agree to the applicable requirements**. For example, this may involve declaring and ruling out conflicts of interest or proving compliance with legal requirements related to human and animal testing.

Furthermore, our [Code of Conduct for Publication Procedures and Ethics](#) defines the responsibility of De Gruyter as a publisher and the Editors we work with, to ensure the legitimacy and quality of our published research. Our principles are based on the guidelines of the [Committee on Publication Ethics \(COPE\)](#).

## Acknowledgments

Authors may wish to acknowledge individuals, working groups, institutions, etc. who provided help and support (other than financial) during research and the preparation of the manuscript (e.g., language checking, writing assistance or proof reading of the article, etc.). Individuals acknowledged are not included on the title page, as a footnote to the title or otherwise.

We do not accept submissions that name Artificial Intelligence (AI) and/or Machine Learning Tools as credited author(s) on a manuscript because such tools cannot take responsibility for the submitted work and therefore cannot be considered as eligible authors. Where such tools or technologies are used as part of the design or methodology of a research study, their use should be clearly described in the Acknowledgments section.

## Informed consent

The [Protection of Privacy](#) is a legal right that must not be infringed without individual informed consent. In cases where the identification of personal information is necessary for scientific reasons, authors should obtain full

documentation of informed consent, including written permission from the patient or their legal guardians prior to inclusion in the study. The following (or similar) statement should be given in the Methods section: *Informed consent was obtained from all individuals included in this study.*

If required for submission, submit the “[Template for Ethical and Legal Declarations](#)” file that asks you to comment on Informed Consent. Provide the same information here. Make sure the information in the text of the manuscript matches the information in the template. If informed consent was not required, insert *Not applicable.* after Informed consent in the “[Template for Ethical and Legal Declarations](#)”.

### Author contributions

In view of research integrity, authorship is generally confined to an individual who has made a substantial intellectual or practical contribution to the conception or design of the project or the acquisition, analysis, or interpretation of data for the work of a publication and/or has drafted the work or reviewed/revised it critically for important intellectual content. The individual(s) listed as author(s) must agree to be accountable for said contribution and approve of the final version. **Honorary authorship is not allowed.** Individuals who helped or participated in certain substantive aspects of the project or work (e.g., technical services staff), but whose contributions were not of sufficient extent to be listed as co-authors, should be appropriately acknowledged, usually in an Acknowledgements section.

Authors are informed immediately after submission of their manuscript. Authors must declare their responsibility for the entire content of the manuscript and may indicate the individual contributions of each author, if applicable. The author contribution statement should appear on the title page before the Reference section as the following default statement: *All authors have accepted responsibility for the entire content of this manuscript and approved its submission.* or *The author has accepted responsibility for the entire content of this manuscript and approved its submission.*

If required for submission, submit the “[Template for Ethical and Legal Declarations](#)” file that asks you to comment on Author Contribution. Provide the same information here as in the manuscript. Make sure that the information in the manuscript matches the information in the template.

Changes in the list of authors are not permitted during the reviewing process and the Editor may decide to request withdrawal and resubmission of the manuscript with the modified list of authors.

### Competing interests

A conflict of interest for a particular manuscript exists when a participant in the peer review and publication process – author, reviewer, and Editor – has ties to activities that could inappropriately influence his or her judgment, regardless of whether the judgment is affected. Financial relationships with industry (for example, employment, consultancies, stock ownership, honoraria, patent applications, expert testimony, grants and other funding), either directly or through immediate family, are usually considered the most important conflicts of interest. However, conflicts can occur for other reasons, such as financial support of the study, ties to health insurance, politics or other stakeholders, personal relationships, academic competition, and intellectual passion.

To ensure fair and objective decision-making, authors must declare any associations that pose a conflict of interest (financial, personal or professional) in connection with the manuscript under evaluation. This must be declared during the submission process and at the end of the manuscript. If you do not have a statement to make, please insert *None declared.* The conflict-of-interest statement should appear on the title page of double-blinded journals, and before the Reference section of single-blinded journals. If applicable, submit a file called “[Template for Ethical and Legal Declarations](#)” that asks you to comment on the Competing interests. Provide the same information here as in the manuscript. Make sure that the information in the manuscript matches the information in the template.

If you do not have a statement to make, the default statement will be set in place: *The authors state no conflict of interest.*

### Research funding

Funding sources should be listed at the end of the manuscript, before the References and/or indicated in the “[Template for Ethical and Legal Declarations](#)”, if required for submission, after Research Funding. When the

study benefitted from funding through an unrestricted grant or other resources provided to a university, college, other research institution, or an individual author, state the name of the institute or organization that provided the funding along with the grant number, if applicable.

If no funding was provided for the research, the default statement will be set in place: *None declared*.

### Data availability

*Pure and Applied Chemistry* requires authors to follow our [Data Sharing Policy](#), which must comply with the European GDPR (*General Data Protection Regulation*) rules. Research data should be made widely available to the research community to demonstrate the robustness and validity of the research presented in the journal, to enable and encourage replication of the results, and to allow the community with opportunities to learn.

By publishing in the journal, authors are required to provide a data availability statement (DAS) in their articles. The DAS confirms the presence or absence of shared data. The DAS should include information on where the data supporting the findings reported in the article can be found, including, if applicable, hyperlinks to publicly archived datasets analyzed or generated during the study. If research data are not publicly available, this must be stated in the manuscript, as well as the conditions for accessing the data.

Authors are encouraged to share their data but are not required to do so. The decision to publish will not be affected by whether authors share their research data or not.

The DAS should be included either before the References or in the “[Template for Ethical and Legal Declarations](#)”, which is required for submission.

## Preparation of manuscript

Please note that IUPAC Technical Reports and IUPAC Recommendation have special requirements. Authors should consult [Kaiser et al. \(2022\)](#) for more details about the preparation and formatting of IUPAC documents.

### Title page information

Please provide the following information on the first page of your manuscript during the submission process:

- Author names

Write at least one given and family name in full. For all other names, initial is sufficient. List authors in the order you want them to appear in the final version. Indicate the corresponding author by using an asterisk “\*” after the family name. Please note that as per De Gruyter policy, no author list changes are permitted after acceptance of a manuscript.

Author footnotes (superscript letters or numbers) to explain authorship details are not all allowed in the author line and will be converted to an author note on the first page. Kindly stick to the wording as in the examples below:

- [Full name author A] and [full name author B] contributed equally to this work.
- [Full name author A] and [full name author B] contributed equally to this work and share first authorship.
- [Full name author A] and [full name author B] share senior authorship.
- [Full name author A] and [full name author B] share first authorship.

- Title and short title

Provide a descriptive, concise, and comprehensible main title as well as an abbreviated form of the main title (running head) with no more than 75 characters (including blanks). The short title will be displayed on the top of each page of the final version.

The article title and subtitle should be in sentence case. Use lowercase letters after colon.

- Affiliations

For the corresponding author supply the following details: e-mail address, department, institution, street, city, postal code and country; for all other authors department, institution, city, postal code and country are mandatory. Please also provide all details concerning the current institutional affiliation in case you changed affiliation during the manuscript preparation and publication process.

Supplying an ORCID is highly recommended (for more information and registration, please visit the [ORCID web-page](#)).

- Please also indicate the word count, number of tables and figures, and whether your manuscript contains supplementary material.

## Language

All manuscripts must be written in clear and concise English. Please use British or American English consistently. De Gruyter does provide a *light* copyedit of manuscripts, but authors remain responsible for being their own copyeditors. If you have reasons to doubt your proficiency with respect to spelling, grammar, etc. (e.g., because English is not your native language), then you may wish to employ – at your expense – the services of a professional language editor.

## General format and manuscript elements

### Abstract

Give a concise summary of your article in an abstract of approx. 200 words in a single paragraph. As abstracts are published separately by abstracting and indexing services, please spell out abbreviations at first use and do not include footnotes, tables, figures or equations. Avoid using references. If it is essential to use a reference in the abstract, please expand it as per journal reference style.

### Keywords

Keywords are used by abstracting and indexing services as well as search engines to facilitate finding your paper. Together with the abstract of your paper, they are a key tool enabling readers to find your paper and for increasing citations. Supply 3–6 specific keywords in alphabetical order and lower case, separated by semicolon. These can be single words, but also short phrases representing the content. Make sure to select precise and concise keywords to your field or sub-field of research. Avoid abbreviations and the repetition of words already used in the article's title.

### Headings

Your manuscript should be subdivided into sections (and, if necessary, subsections). These sections should be labeled with headings in a consistent format and with a clear hierarchy of section headings. Limit your subsections to a maximum of four levels. For subdivided sections ensure that they have at least two subheadings on one level. Headings do not have an end period. Headings should be numbered and in sentence case. Use lowercase letters after colon.

### References

Please adhere strictly to the ACS numbered reference style as outlined in the Reference Style Sheet below. The style sheet provides examples for different types of citations in the text as well as for different bibliographic items in the reference list. References should be typed in brackets, e.g., (41), (42–44) or (41, 42, 45), in sequence. Et al. usage is not allowed, all authors should be listed. Author initials abbreviated with dot and space. Issue number allowed.

All references mentioned in the reference list must be mentioned in the text, and vice versa. References appear at the end of the manuscript in numerical order and should be accompanied by their digital object identifier (DOI), when available. Abbreviations of journal titles should agree with usage by Chemical Abstracts (<https://cassi.cas.org>).

## Reference Style Sheet

- Journal

1. Foster, J. C.; Varlas, S.; Couturaud, B.; Coe, J.; O'Reilly, R. K. Getting into Shape: Reflections on a New Generation of Cylindrical Nanostructures' Self-Assembly Using Polymer Building Block. *J. Am. Chem. Soc.* **2019**, *141* (7), 2742–2753. <https://doi.org/10.1021/jacs.8b08648>. Article title allowed, not mandatory.

- Epub ahead of print (DOI)
5. Shah H. H.; Stratz S.; Hauser P. C. Electro-Driven Extraction Across a Polymer Inclusion Membrane in a Flow-Through Cell. *J. Chromatogr. A* **2013**. <https://doi.org/10.1016/j.chroma.2013.01.062>
- Journal – in press/forthcoming
6. Tang D.; Jankowiak R.; Small G. J.; Tiede D. M. Deepoxy T-2 Tetrol: A Metabolite of TO2 Toxin Found in Cow Urine. *Chem. Phys.*, in press.
- Book/monograph
7. Wertheimer A. I.; Norris, J. *Chemometrics with R*; Springer: London, 2011.
- Book with edition
8. King Lester S. *Why Not Say It Clearly: A Guide to Scientific Writing*, 2nd ed.; Little, Brown: Boston, MA, 1991.
- Edited book
9. Warren B. K.; Oyama S. T.; Eds. *The Chemistry of the Atmosphere: Oxidants and Oxidation in the Earth's Atmosphere*; Royal Society of Chemistry: Cambridge, England, 1995.
- Edited book with chapter title (and editors)
10. Laidlaw I.; Steinmetz M. Introduction to differential sedimentation. In *Analytical Ultracentrifugation: Techniques and Methods*; Scott D. L., Harding S. E., Rowe A. J., Eds. Royal Society of Chemistry: Cambridge, 2005; pp. 270–290.
- Book series
11. Wiberg K. Guidelines for drinking water quality. In *Investigations Rates and Mechanisms Reactions*; Lewis E. S., Ed.; Techniques of Chemistry, Vol. VI, 1974; p. 764.
- Electronic publications without DOI
13. Hammond, C. *The Basics of Crystallography and Diffraction*, 4th ed.; International Union of Crystallography Texts on Crystallography, Vol. 21; Oxford University Press, 2015. <https://doi.org/10.1093/acprof:oso/9780198738671.001.0001>
- Electronic publications without DOI
14. American Chemical Society, Committee on Chemical Safety, Task Force for Safety Education Guidelines. *Guidelines for Chemical Laboratory Safety in Academic Institutions*. American Chemical Society, 2016. <https://www.acs.org/content/dam/acsorg/about/governance/committees/chemicalsafety/publications/acs-safety-guidelines-academic.pdf> (accessed 2019-02-21).
- Thesis/Dissertation
15. Cable, M. L. Life in Extreme Environments: Lanthanide-Based Detection of Bacterial Spores and Other Sensor Design Pursuits. Ph.D. Dissertation, California Institute of Technology, Pasadena, CA, 2010. <http://resolver.caltech.edu/CaltechTHESIS:05102010-145436548> (accessed 2019-09-10).
16. Tsien, R. Y. The Design and Use of Organic Chemical Tools in Cellular Physiology. Ph.D. Thesis, University of Cambridge, Cambridge, U.K., 1976.
- Report
17. Hung, C.-C.; Hurst, J.; Santiago, D. Boron Nitride Nanoribbons from Exfoliation of Boron Nitride Nanotubes; NASA/TM-2017-219455; National Aeronautics and Space Administration, Glenn Research Center: Cleveland, OH, 2017. <https://ntrs.nasa.gov/search.jsp?R=2017000388> (accessed 2019-09-10).
- Patent
18. Lois-Caballe, C.; Baltimore, D.; Qin, X.-F. Method for Expression of Small RNA Molecules within a Cell. US 7 732 193 B2, 2010.

- Standards

19. ASTM International. *Standard Test Method for Tensile Properties of Plastics*; ASTM D638-14; West Conshohocken, PA, 2014. DOI: 10.1520/D0638-14

- Computer Programs

20. *Schrödinger Release 2019-3: BioLuminate*; Schrödinger, LLC: New York, 2019. <https://www.schrodinger.com/products/bioluminate> (accessed 2019-09-08).

- Websites

21. *ACS Publications Home Page*. <https://pubs.acs.org/> (accessed 2019-02-21).

- Web documents

22. American Chemical Society, Committee on Chemical Safety, Task Force for Safety Education Guidelines. *Guidelines for Chemical Laboratory Safety in Academic Institutions*. American Chemical Society, 2016. <https://www.acs.org/content/dam/acsorg/about/governance/committees/chemicalsafety/publications/acs-safety-guidelines-academic.pdf> (accessed 2019-02-21).

- Database

23. *SpectraBase*. Bio-Rad Laboratories. <https://spectrabase.com/> (accessed 2020-01-05).

- Corporate publication

3. American Society of Brewing Chemists. *Methods of Analysis*, 8th ed.; Springer: London, 1992.

### Figures and figure captions

Graphs, line drawings, photographs, schemes, diagrams, etc. may be used to illustrate your findings. Publication of color figures is provided free of charge in both online and print editions. The publication quality always depends directly on the quality and size of the delivered data.

Lettering, numbering, and symbols in the figures must be clear and suitable for reduction to single or double column width. Lettering and lines on graphs should also be strong enough to withstand reduction. Figures should be submitted in the highest resolution possible (low resolution files may look satisfactory online but will not print well). Chemical schemes, etc., should be supplied as standard figures, and, in all cases, the figure must be accompanied by a title and/or legend that describes the illustration.

The word 'Figure' should be shortened to 'Fig.' at the beginning of figure captions and in the text, except where the word 'Figure' begins a sentence. Each figure should be uploaded separately as .jpg, .eps, .png, .tiff or as separate ChemDraw (or an equivalent program) files. Images should have a minimum resolution of 300 dpi (color or black-white pixel graphics/half-tone images) in the intended size (600dpi combination of pixel graphic and line drawing, 1200dpi for line drawings). When drawing bar graphs, use patterning/color instead of grey scales (faint shading may be lost upon reproduction). Figures should not display any frames.

Figures should be numbered consecutively using Arabic numerals (from 1) throughout the text. Please make sure that all figures are explicitly referred to in the text. Do not end the text immediately preceding the suggested positioning of a figure with a colon and avoid expressions such as "in Figure 1 below/above", as the exact positioning of these elements cannot be determined until after the manuscript has been typeset. Note that figures will usually be placed on the top or the bottom of the page in the final layout.

Provide a concise and self-explanatory caption for each figure. In case of multi-part figures, please include a main caption as well as part figure captions.

The key to the symbols depicted in the figures should be included in the figure itself, where possible. Otherwise, include it in the caption. The caption itself should not be included in the figure.

Please make sure that letters, numbers, symbols, text, etc. included in the figure are clear, easy to read (not below 6pt, preferably in Arial or Helvetica) and uniform in style.

It is the authors' responsibility to use images that do not infringe on any copyrights, performing rights, trademark rights, personal rights or any other third-party rights or are otherwise unlawful. Copyright permissions can be obtained through the [Copyright Clearance Center](#).

### Tables and table captions

Tables should not be used more than is necessary and they should not duplicate results that are presented in graphical form. Tables should be numbered serially throughout the paper in Arabic numerals and should be cited in the text at first occurrence. Tables should be provided in an editable source format (Word, LaTeX). Please avoid handing in tables as image or Excel files.

Table headings should appear above the table with one line space between the heading and the table. The word 'Table' should be boldfaced, and the table heading should be typed with an initial capital for the first word and proper nouns only. If necessary, a font size smaller than 9 points may be used.

Provide a short footnote if necessary to make each table self-explanatory. In column heads, separate units with a comma and use parentheses or square brackets for additional measures (e.g., %, range, etc.). Use footnotes in alphabetical order (a, b, c, etc.) to give emphasis or further information. Expand abbreviations used in tables in footnotes.

In case bold type or italics are used to highlight information, please explain their meaning.

Avoid color, shading, vertical lines, and other cell borders. Note that most horizontal lines within the table body will be removed during the production process.

Indicate where to place the table approximately (e.g., [Place Table 1 near here]). Do not end the text immediately preceding the suggested positioning of a table with a colon and avoid expressions such as "in Table 1 below/above", as the exact positioning of these elements cannot be determined until after the manuscript has been typeset. Note that tables will usually be placed on the top or the bottom of the page in the final layout.

### Abbreviations

The use of abbreviations and acronyms is permitted given that they are expanded in full when used the first time with the abbreviation in parentheses (applies to abstract and main text). Please use them consistently thereafter. Avoid using non-standard abbreviations unless they appear more than three times in the text. We recommend providing a list with an overview of all abbreviations.

### Equations and symbols

Equations should be well-aligned and not crowded. Use only Latin and Greek alphabets. Avoid complicated superscripts and subscripts by introducing new symbols. Avoid repetition of a complicated expression by representing it with a symbol. For MS Word submissions create equations using the Microsoft equation editor or a corresponding add-on. Do not submit math equations as images, but as editable text. Number displayed equations consecutively with Arabic numerals (if referred to in the text).

### Structural formulas

Formulas should be prepared with particular care, preferably with a suitable computer program. They may be numbered with boldface Arabic numerals. Within reason, these numbers may be used in the text to avoid repetition of long chemical names, but numbers should not be used in the abstract. Structural formulas should be presented in groups where feasible to improve presentation and save space.

### Mathematical expressions and chemical equations

Mathematical expressions and chemical equations should be indented on the left, with space above and below, and should be numbered in parentheses with consecutive Arabic numerals flush right.

$$k(T) = A \exp(-E_A / RT) \quad (1)$$

Simple mathematical expressions should be left in the text, written in one line instead of in two-line form wherever possible to avoid awkward line spacing. Use additional half line spaces as needed to ensure that mathematical expressions in the text do not overlap preceding or succeeding lines.

### Numbers

Numbers should be printed in roman (upright) fonts. Numerical values of physical quantities (and the symbols of units) should be printed in roman even in italic texts. The decimal marker for IUPAC publications in English should be a point on the line. For many digit numbers the digits should be grouped in threes around the decimal marker with a small space [it is best to use a nonbreaking space of constant width (in MS Word under Windows, use ctrl-shift-space, or under Mac OS, use command-space) which also prevents the splitting of numbers on line breaks] between the groups, but never leaving a single digit on its own.

Examples:

Numbers in a running text: 3.1416 not 3.141 6

Numbers in a column:

|    |         |    |
|----|---------|----|
| 1  | 000.234 | 5  |
| 21 | 110.216 | 48 |
|    | 500.123 | 3  |

### Symbols and units

Symbols for scalar physical quantities (or variables) should be set in italic (sloping) type, and symbols for units, or labels, should be set in roman (upright) type. Quantity symbols may be qualified by subscripts or by further information in parentheses; subscripts should themselves be in italic type when they represent physical quantities, and otherwise in roman type. For other classes of quantities, (vectors, matrices, etc.) see additional information given below.

Quantity calculus should be used in presenting the values of physical quantities. See some examples below and the IUPAC Green Book (ref. 1, list below) as well as [Kaiser et al. \(2022\)](#) for further details.

$p = 0.123 \text{ mbar} = 12.3 \text{ Pa} = 12.3 \text{ N m}^{-2}$  or  $p/\text{Pa} = 12.3$

$r = 2.13 \text{ \AA} = 0.213 \text{ nm}$  or  $r/\text{nm} = 0.213$

$k = 10^{8.2} \text{ s}^{-1}$  or  $\lg(k/\text{s}^{-1}) = 8.2$

Note particularly the use of an italic font for quantity symbols such as  $p$ ,  $r$ , and  $k$ , and the use of an upright font for unit symbols such as Pa, mbar, m, nm, and s. The format “quantity symbol divided by the unit” as in  $r/\text{nm} = 0.213$ , is particularly convenient for heading the columns of tables and labeling the axes of graphs, so that the entries in the table columns or the labels on the tick marks of the graph may be pure numbers. The symbols  $\lg$  and  $\ln$  should be used for  $\log_{10}$  and  $\log_e$ , respectively.

### Appendices

Use appendices for information that supports your findings but is not essential for the understanding of your paper (e.g., lengthy mathematical proofs, tables, graphics, etc.). Cite appendices within the main text. Tables and figures in the appendix should be numbered consecutively as follows: Figure A.1, Table A.1, Figure A.2, Table A.2, etc. The appendix is placed at the end of the main text before the reference list.

### Supplementary material

Supplementary material which may offer further information on your work but does not belong to the core part of the article, will not be part of the typeset article PDF. The material will be made available as a separate download in the online version of the article. Supplementary material may contain questionnaires for discussed surveys, protocols, code samples, datasets, extensive tables, additional figures, multimedia files (audio, video, animations), etc. If the manuscript is accepted, supplementary material will be referenced in the print version, but will be published online only.

Please provide supplementary material data as separate file(s) of no more than 10 MB per file during submission. Note that the material should be publication-ready (not in track-changes mode), as it will not be typeset, but published exactly as supplied. Within the text, the supplementary material must be cited consecutively and be referred to as supplementary material data (e.g., see Supplementary Material, Fig. 1, or Figure S.1, Table S.1, etc.).

**Please contact [pac@degruyter.com](mailto:pac@degruyter.com) for any further questions:**

Name: Masha Dorogova

Email: [masha.dorogova@degruyter.com](mailto:masha.dorogova@degruyter.com)
